# Supplementary material for: Methods of analysing chemicals associated with microplastics: a review
Source: Royal Society of Chemistry journal article supplement (doi:10.1039/c6ay02971j), 2017-01-01
Supplement: c6ay02971j1.pdf [file c6ay02971j1.pdf]

## Supporting Information

**Title: Methods of analysing chemicals associated with microplastics: A review**

Table S1. Sample amount of microplastics used per extraction.

| Sample type and amount     | No. of publications |
|----------------------------|---------------------|
| <b>Pellet</b>              |                     |
| 5 pellets                  | 10                  |
| 10 pellets                 | 2                   |
| 25 or 30 pellets           | 2                   |
| ≤ 1 g                      | 7                   |
| > 1 g                      | 6                   |
| <b>Fragment</b>            |                     |
| ≤ 1 g                      | 2                   |
| > 1 g                      | 4                   |
| <b>EPS</b>                 |                     |
| 30 mg                      | 1                   |
| 15 mg                      | 2                   |
| <b>Macro-sized plastic</b> |                     |
| ≤ 1 g                      | 1                   |
| > 1 g                      | 1                   |

Table 2S Summary of analytical approaches for chemicals associated microplastics collected from the marine environment.

| Ref # | Sample type                                          | Sample amount per extraction          | Sampling location                         | Target compounds                                      | Method                                                     |                                     |                                                                                                                  |                                    |
|-------|------------------------------------------------------|---------------------------------------|-------------------------------------------|-------------------------------------------------------|------------------------------------------------------------|-------------------------------------|------------------------------------------------------------------------------------------------------------------|------------------------------------|
|       |                                                      |                                       |                                           |                                                       | Extraction                                                 | Extraction solvent                  | Separation                                                                                                       | Detection                          |
| 2     | Pellet (PP)                                          | (no information)                      | Japan (B)                                 | PCBs, DDTs                                            | Soxhlet                                                    | Hexane                              | Silica                                                                                                           |                                    |
| 5     | Pellet (Colored)                                     | 2.5 g                                 | Tokyo, Japan (B)                          | PCBs                                                  | Soxhlet                                                    | DCM                                 | Silica                                                                                                           | GC-ECD                             |
| 6     | Pellets, Fragment                                    | 1–2 g                                 | North Pacific Gyre (B)                    | PCBs, PAHs                                            | Soxhlet                                                    | DCM                                 | –                                                                                                                | GC-MS                              |
| 7     | Pellet (yellowing PE)                                | 2–10 pellets                          | USA, Europe, Asia(B)                      | PCBs, DDTs, HCHs, PAHs                                | Soaking                                                    | Hexane                              | Silica                                                                                                           | GC-MS, GC-ECD                      |
| 8     | Fragment, Pellet                                     | 0.6 g (pellet)<br>1.0 g (fragment)    | Southern Brazil (Seabird digestive tract) | PCBs, OCPs                                            | Soxhlet                                                    | HEX/DCM                             | Alumina                                                                                                          | GC-ECD, GC-MS                      |
| 9     | Pellet (Colored, Aged)                               | 2 g                                   | Portugal (B)                              | PAHs, PCBs, DDTs                                      | PAHs: ASE<br>PCBs, DDTs: Soxhlet                           | PAHs: HEX/ACE<br>PCBs, DDTs: Hexane | PAHs: Silica/Alumina<br>PCBs, DDTs: Acid Florisil                                                                | GC-MS                              |
| 10    | Pellet (yellowing PE)                                | 25 pellets                            | England( B)                               | Al, Fe, Mn, Cu, Zn, Pb, Ag, Cd, Co, Cr, Mo, Sb, Sn, U | Acid digestion                                             | HCl/HNO <sub>3</sub>                | –                                                                                                                | ICP-MS, SEM-EDS                    |
| 11    | Pellet (PE+PP), Fragment                             | 5 pellets                             | Remote/Urban (B)<br>Open ocean(W)         | PCBs, DDTs, PAHs, PBDEs, BAP, NP                      | Soxhlet                                                    | DCM                                 | Silica                                                                                                           | GC-IT-MS, GC-MS                    |
| 12    | Pellet (yellowing PE)                                | 5 pellets                             | Greece(B)                                 | PCBs, DDTs, HCHs, PAHs                                | Soaking                                                    | Hexane                              | Silica                                                                                                           | GC-MS/MS, GC-ECD                   |
| 13    | Pellets, Fragment, PS foam, rubber                   | 5 g                                   | California, USA(B)                        | PAHs, PCBs, DDTs                                      | Ultrasonication                                            | HEX/ACE                             | Silica base SPE                                                                                                  | GC/MS                              |
| 14    | Plastic litter (PVC float, PE, PP, PET, PVC, EPS)    | (no nformation)                       | Japan (B)                                 | Cr, Cd, Sn, Sb, Pb                                    | –                                                          | –                                   | –                                                                                                                | X-ray fluorescence analyzer (XRF)  |
| 15    | Pellet (yellowing PE)                                | 5 pellets                             | Coasts & Remote island (B)                | PCBs, DDTs, HCHs                                      | Soaking                                                    | Hexane                              | Silica                                                                                                           | GC-MS                              |
| 16    | Pellet ((PE)                                         | 5 pellets                             | South Africa(B)                           | PCB, DDTs, HCHs                                       | Soaking                                                    | Hexane                              | Silica                                                                                                           | GC-ECD                             |
| 17    | Pellet (PVC,PE, PP, PET, PS; field deployment)       | (no nformation)                       | San Diego Bay (W)                         | PAHs                                                  | Ultrasonication                                            | HEX/ACE                             | Silica base SPE                                                                                                  | GC/MS                              |
| 18    | Pellet (PET, HDPE, PVC, LDPE, PP; field deployment ) | 2 g                                   | San Diego Bay, USA (W)                    | PAHs, PCBs, DDTs                                      | Ultrasonication                                            | HEX/ACE                             | Silica base SPE                                                                                                  | GC/MS                              |
| 19    | Pellet (Colored, Aged)                               | 1 g                                   | Portugal (B)                              | PCBs, DDTs, PAHs                                      | -PAHs: Accelerated solvent extractor<br>-PCB,DDTS: Soxhlet | PAHs: HEX/ACE<br>PCB, DDTS: Hexane  | PAHs: Silica/Alumina<br>PCB, DDTS: Florisil                                                                      | GC-MS, GC-ECD                      |
| 20    | Pellet (yellowing PE)                                | 5 pellets                             | Portugal (B)                              | PCBs, DDTs, PAHs, Hopanes                             | Soaking                                                    | Hexane                              | Silica                                                                                                           | GC-MS                              |
| 21    | Fragment                                             | (no nformation)                       | North Pacific Ocean (Seabird stomach)     | PBDEs                                                 | Soxhlet                                                    | DCM                                 | Silica                                                                                                           | GC-IT-MS                           |
| 22    | Pellet                                               | 1 g                                   | Brazil (B)                                | PAHs                                                  | Soxhlet                                                    | HEX/DCM                             | Silica/Alumina                                                                                                   | GC-MS                              |
| 23    | Pellet                                               | 1 g                                   | Brazil (B)                                | PAHs                                                  | Soxhlet                                                    | (No description)                    | Silica/Alumina                                                                                                   | GC-MS                              |
| 24    | Styrofoam (EPS)                                      | 15 mg                                 | Baltic Sea (B)                            | Hg                                                    | –                                                          | –                                   | –                                                                                                                | Pyrolysis mercury analyzer AMA 254 |
| 25    | Pellet (PET, HDPE, PVC, LDPE, PP; field deployment)  | 30 pellets                            | San Diego Bay(W)                          | Cr, Ni, Zn, Fe, Mn, Co, Pb                            | Acid digestion                                             | HNO <sub>3</sub> /HCl               | –                                                                                                                | ICP-MS                             |
| 26    | Fragment                                             | BAP: 1 g<br>APs: 2 g<br>PCB,PBDE: 5 g | South Atlantic Gyre(W)                    | PBDEs, PCBs, BPA, APs                                 | So aking                                                   | DCM                                 | •Bisphenol A: Waters Oasis HLB cartridge<br>•Alkylphenols: SPE<br>•PCB,PBDE: Acid/base silica, Florisil, Alumina | LC/MS/MS,GC/HRMS                   |
| 27    | Pellet (yellowing PE)                                | 5 pellets                             | Asia (B)                                  | PCBs, PBDEs                                           | Soaking                                                    | Hexane                              | Silica                                                                                                           | GC-MS, GC-ECD                      |
| 28    | Pellet (yellowing PE)                                | 5 pellets                             | Ghana (B)                                 | PCBs, PAHs                                            | Soaking                                                    | Hexane                              | Silica                                                                                                           | GC-MS, GC-ECD                      |
| 29    | Pellet                                               | 1 g                                   | Greece(B)                                 | PFASs                                                 | Ultrasonication                                            | Methanol                            | –                                                                                                                | LC-MS/MS                           |

|    |                                                                             |             |                             |                                                |                 |         |                                        |                                    |
|----|-----------------------------------------------------------------------------|-------------|-----------------------------|------------------------------------------------|-----------------|---------|----------------------------------------|------------------------------------|
| 30 | Pellet (yellowing PE)                                                       | 5 pellets   | Australia & New Zealand (B) | PCBs, DDTs, HCHs                               | Soaking         | Hexane  | Silica                                 | GC-MS                              |
| 31 | Pellet (yellowing PE)                                                       | 5 pellets   | Mumbai (B)                  | PCBs, OCPs                                     | Soaking         | Hexane  | Silica                                 | GC-ECD                             |
| 32 | Plastic debris (Fiber, fragment, bag)                                       | 0.15–0.60 g | Belgium (B)                 | Non-target screening; PCBs, PAHs: quantitation | Soxhlet         | HEX/DCM | Silica (fractionation, derivatization) | GC-ITMS                            |
| 33 | Pellet (weathered, transparent) Fragment (PE, PU, PE/PP, PP; less than 1cm) | 1 g         | North Pacific Gyre (W)      | PCB, DDTs, HCHs                                | Soxhlet         | DCM     | Silica                                 | GC-MS                              |
| 34 | Plastic debris (PE, PP, PET, PE/PP, acrylic/styrene)                        | 0.3 g       | Korea (B)                   | Non-target screening                           | Soxhlet         | DCM     | –                                      | GC-MS                              |
| 35 | Pellet                                                                      | 10 pellets  | China (B)                   | PCBs, OCPs, PAHs                               | Ultrasonication | Hexane  | Silica/Florisil                        | GC-ECD, GC-MS                      |
| 36 | Fragment                                                                    | 2 g         | Norway (Seabird stomach)    | PCBs, PBDEs, DDTs                              | Ultrasonication | HEX/ACE | GPC, Florisil SPE                      | Quattro micro TM mass spectrometer |
| 37 | Pellet (yellowing PE)                                                       | 5 pellets   | Vietnam (B)                 | PCB, DDTs, HCHs                                | Soaking         | Hexane  | Silica                                 | GC-MS, GC-ECD                      |
| 38 | Styrofoam (EPS)                                                             | 0.03 g      | Korea (W)                   | HBCDs                                          | Soaking         | DCM     | –                                      | HPLC-MS/MS                         |
| 39 | Pellet (yellowing)                                                          | 1 g         | Brazil (B)                  | PCBs, DDTs, PAHs,                              | Soxhlet         | DCM/HEX | Alumina                                | GC-MS, GC-ECD                      |

B: beach, W: water column, HEX: hexane, DCM: dichloromethane, CAN: acetonitrile
